# Supplementary material
Source: PubMed Central journal article supplement (PMC3906819)
Supplement: ismej2013158x1.pdf [file ismej2013158x1.pdf]

## Supplementary Information SII

### Modeling N uptake

We defined the following seven root tip categories ( $RT_{c1}$  to  $7$ ) for ectomycorrhizal (EM) plants: NM root tips =  $RT_{NM}$ , dead root tips =  $RT_{DR}$ , *Cenococcum geophilum*-associated root tips =  $RT_{Cg}$ , *Tomentella punicea*-associated root tips =  $RT_{Tp}$ , *Tuber rufum*-associated root tips =  $RT_{Tr}$ , *Tuber* sp.1-associated root tips =  $RT_{Tsp1}$ , and *Tuber* sp.2-associated root tips =  $RT_{Tsp2}$ . The fraction of root tips colonized by other fungi was  $< 5\%$  and, therefore, neglected. For non-mycorrhizal (NM) plants two root tip categories were defined:  $RT_{NM}$  and  $RT_{DR}$ .

#### <sup>15</sup>N contents of EM plants

We assumed that the specific N enrichment (measured as <sup>15</sup>N atom-%) in a certain root tip category is an indicator for the physiological activity of N metabolism in this root tip category ( $PA_{RTc}$ ) after correction for the specific <sup>15</sup>N enrichment of dead root tips. We calculated for each RTc:

$$PA_{RTc} = (\text{specific } ^{15}\text{N enrichment of RTc}) - (\text{specific } ^{15}\text{N enrichment of } RT_{DR})$$

The physiological activity of the root tip categories of EM plants was then normalized with respect to that of NM root tips of NM plants, which yields a specific activity coefficient (AC) for each category of root tips:

$$AC_c = PA_{RTc} / PA_{RT(NM \text{ of NM plants})}$$

To calculate the <sup>15</sup>N content of EM plants ( $\mu\text{g}$ ) we used the mean N flux per  $RT_{NM}$  of the NM plants ( $\mu\text{g } RT^{-1} d^{-1}$ ), the duration of the <sup>15</sup>N exposure (time  $d^{-1}$ ), the specific  $AC_c$  and the number of root tips in each category ( $n$  RTc):

$$\text{Calculated } ^{15}\text{N content of EM plants} = \text{N flux per } RT_{(NM \text{ of NM plants})} * \text{time} * \sum_{c=1}^{c=7} AC_c * n \text{ RTc}$$

with

N flux per  $RT_{(NM \text{ of } NM \text{ plants})} = \text{^{15}N content of NM plants} / (\text{number of } RT_{NM \text{ of } NM \text{ plants}} * \text{time})$

*<sup>15</sup>N contents in NM plants*

To calculate the <sup>15</sup>N content of NM plants (μg) we corrected the measured <sup>15</sup>N contents of EM plants (μg) for the different physiological activities of the root tips of EM plants relative to those of NM plants:

Calculated <sup>15</sup>N content of NM plants =

measured <sup>15</sup>N content of EM plants \*  $[nRT_{NM \text{ of } NM \text{ plants}} * (\sum_{c=1}^{c=7} AC_c * n RT_c)^{-1}]$
