# Supplementary material
Source: PubMed Central journal article supplement (PMC3906819)
Supplement: ismej2013158x2.pdf [file ismej2013158x2.pdf]

**Supplementary Figure S1: Molecular identification, anatomical and morphological characterization of ectomycorrhizal fungal species found on roots of young beech (*Fagus sylvatica*).** Column “Species” contains name of species and Genbank accession number, “reference accession number” contains species name identified by best BLAST match and its accession number in either UNITE (all accessions starting with UDB) or Genbank (all other numbers), “Max ident” indicates the length of the nucleotide sequences and their identity (%) with the reference sequence.

| Species                          | Best BLAST match*               |                  | Cross section                                                                                                     | Morphotype                                                                                                                                                               |
|----------------------------------|---------------------------------|------------------|-------------------------------------------------------------------------------------------------------------------|--------------------------------------------------------------------------------------------------------------------------------------------------------------------------|
|                                  | Reference accession No.         | Max Ident (%)    |                                                                                                                   |                                                                                                                                                                          |
| <i>Cenococcum geophilum</i>      | Not sequenced <sup>1</sup>      |                  |  <p>Mantel width: 30.0µm</p>   |  <p>Single, black, compact mantle, black rigid hyphae emanating from mantle</p>      |
| <i>Tuber rufum</i><br>(HM748641) | UDB000996<br><i>Tuber rufum</i> | 491/493<br>(99%) |  <p>Mantel width: 22.34µm</p> |  <p>Monopodial-pinnate ramification, light brown, rare whitish emanating hyphae</p> |
|                                  | FN433168<br><i>Tuber rufum</i>  | 505/512<br>(99%) |                                                                                                                   |                                                                                                                                                                          |

|                                                   |                                                  |                   |                                                                                      |                                                                                             |
|---------------------------------------------------|--------------------------------------------------|-------------------|--------------------------------------------------------------------------------------|---------------------------------------------------------------------------------------------|
| <i>Tuber</i> sp 2<br>(HM748637)                   | UDB001385<br><i>Tuber</i><br><i>puberulum</i>    | 286/311<br>(92%)  | 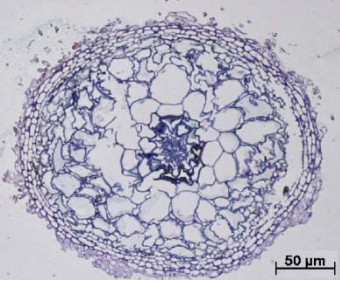   |          |
|                                                   | FM205642<br><i>Tuber borchii</i>                 | 459/461<br>(99%)  | Mantel width: 20.5μm                                                                 | Single or monopodial<br>branched, brown orange,<br>abundant equal-short<br>emanating hyphae |
| <i>Tomentella</i><br><i>punicea</i><br>(HM748638) | UDB000950<br><i>Tomentella</i><br><i>punicea</i> | 456/458<br>(99%)  |   |         |
|                                                   | AY299299<br>Unculture<br>Tomentella              | 457/458<br>(99%)  | Mantel width: 36.8μm                                                                 | Monopodial irregularly<br>branched, brown, few<br>emanating hyphae                          |
| <i>Tuber</i> sp 1<br>(HM748636)                   | UDB000121<br><i>Tuber</i><br><i>maculatum</i>    | 310/345<br>(89%)  |  |        |
|                                                   | EU668241<br>Uncultured<br>Tuber isolate          | 387/387<br>(100%) | Mantel width: 28.8μm                                                                 | Monopodial-pinnate, light<br>brown, with short irregular<br>hyphae                          |
| UEM<br>Sebacina<br>(HM748642)                     | UDB000975<br><i>Sebacina</i><br><i>epigaea</i>   | 292/303<br>(96%)  |                                                                                      |        |

|                                           |                                                 |                  |  |                                                                                                                                                                                                       |
|-------------------------------------------|-------------------------------------------------|------------------|--|-------------------------------------------------------------------------------------------------------------------------------------------------------------------------------------------------------|
|                                           | EU668267<br>Uncultured<br><i>Sebacina</i>       | 387/394<br>(98%) |  | Monopodial ramified, brown yellowish, with white long emanating hyphae                                                                                                                                |
| Cortinarius<br>like                       | Not<br>sequenced <sup>1</sup>                   |                  |  | 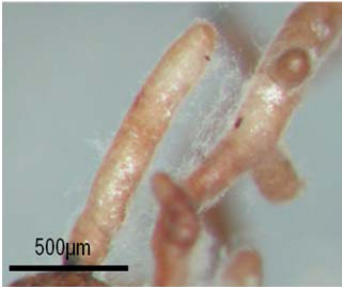 <p>Irregularly pinnate ramified, brown-reddish, with abundant white emanating hyphae and rhizomorphs</p>          |
| <i>Tomentella badia</i><br>(HM748639)     | UDB000952<br><i>Tomentella badia</i>            | 396/399<br>(98%) |  |  <p>Monopodial, brown, with only few emanating hyphae</p>                                                         |
|                                           | GQ478014<br>Uncultured<br><i>Tomentella</i>     | 472/488<br>(96%) |  |                                                                                                                                                                                                       |
| UEM<br><i>Telephoraceae</i><br>(HM748640) | UDB003313<br><i>Tomentella</i>                  | 500/530<br>(94%) |  |  <p>Monopodial-pinnate or monopodial-pyramidal, black, with rigid, relative abundant, yellow brownish hyphae</p> |
|                                           | DQ150126:<br>Uncultured<br><i>Telephoraceae</i> | 400/409<br>(95%) |  |                                                                                                                                                                                                       |

|                                          |                                                  |                   |  |                                                                                     |
|------------------------------------------|--------------------------------------------------|-------------------|--|-------------------------------------------------------------------------------------|
| <i>Tomentella viridula</i><br>(HM748643) | UDB000261<br><i>Tomentella viridula</i>          | 447/448<br>(99%)  |  |  |
|                                          | EU816647:<br>Uncultured<br><i>Thelephoraceae</i> | 448/448<br>(100%) |  |                                                                                     |

\*Best alignments by UNITE (accession numbers starting with UDB) or NCBI (all other accession numbers) and similarities with known BLAST sequences are shown. <sup>1</sup>sequencing failed and the species were determined by the characteristic morphotypes.
