# Supplementary material
Source: PubMed Central journal article supplement (PMC3906819)

**Figure S3:** Correlation of ectomycorrhizal  $^{15}\text{N}$  enrichment in two independent experiments. Data show means ( $\pm$  SE) for  $^{15}\text{N}$  enrichment in EMF (Cg *Cenococcum geophilum*, Tr *Tuber rufum*, Tsp2 *Tuber* sp.2), in dead (dr) and non-mycorrhizal (nm) root tips in two experiments (Exp 1, Exp 2).

Plant preparation, their growth in sand cultures and the experimental treatments (LC: light-control, LD: light-drought, SC: shade-control, SD: shade-drought) are described under materials and methods. In contrast to Exp 1, plants in Exp. 2 were watered only once a day with 20 ml nutrient solution, which resulted in fluctuations in the plant water potential between -0.3 MPa to -1.6 MPa. Furthermore drought stress in Exp. 2 was imposed by withholding water until the water potential had decreased to -2.6 MPa. Then all plants were watered for 3 days with the  $^{15}\text{N}$ -containing nutrient solution (re-watering). The plants were harvested, used for mycorrhizal analyses and  $^{15}\text{N}$  measurements as described under materials and methods.

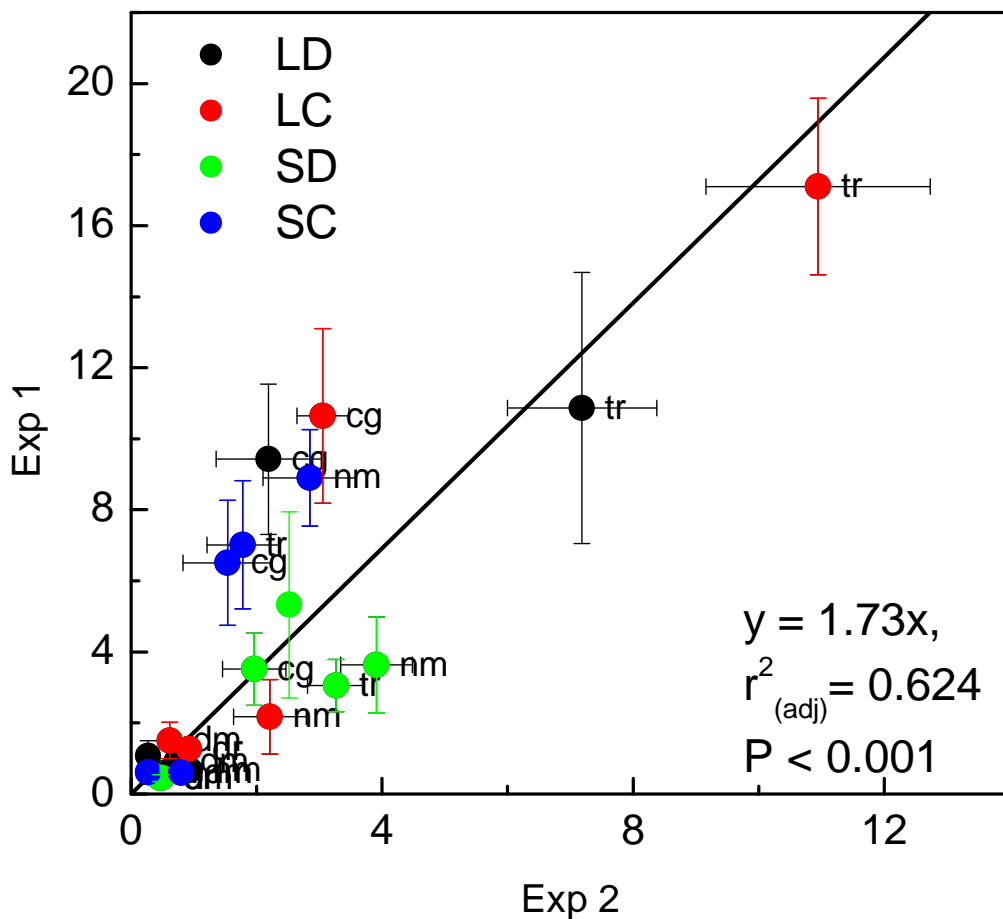

Supplement: ismej2013158x4.pdf [file ismej2013158x4.pdf]
