# Supplementary material
Source: PubMed Central journal article supplement (PMC3906819)

**Supplementary Figure S4.** Regression analysis between the amount of <sup>15</sup>N in the beech ectomycorrhizal root tips and the fungal mantle volume.

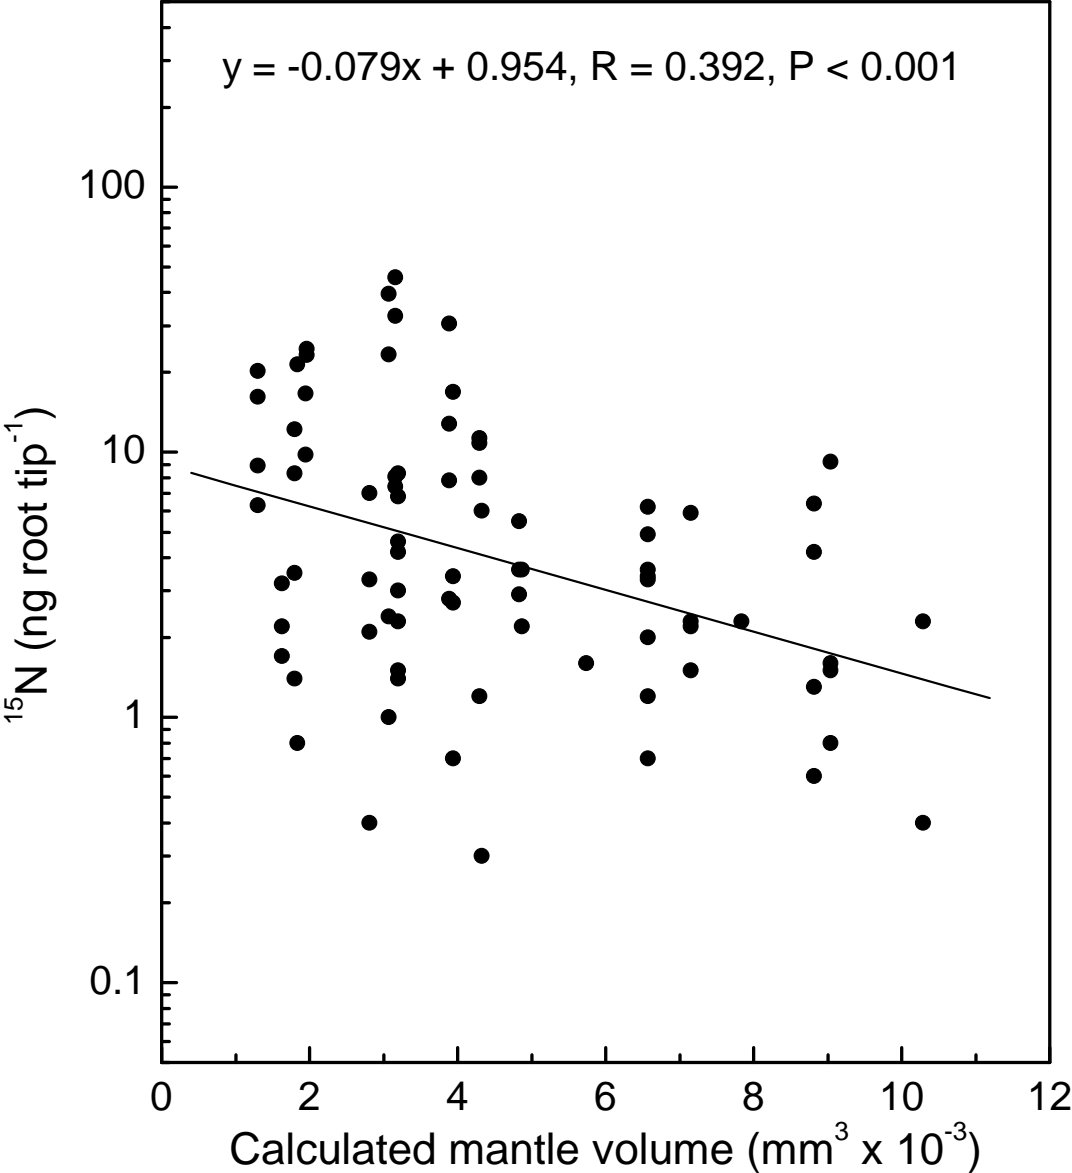

Supplement: ismej2013158x5.pdf [file ismej2013158x5.pdf]
