# Supplementary material
Source: PubMed Central journal article supplement (PMC3906819)
Supplement: ismej2013158x6.pdf [file ismej2013158x6.pdf]

**Supplementary Table S1: Multivariate analysis of the influence of the variables light, shade, irrigation and drought on ectomycorrhizal fungal species associated with the roots of beech (*Fagus sylvatica*) seedlings.**

(a) Factor loadings of the principal component analysis in figure 1. LC = full light, well watered; LD = full light, drought; SC = shade, well watered; SD = shade, drought.

| Categorical variables | PC1    | PC 2    | PC 3     | PC 4    |
|-----------------------|--------|---------|----------|---------|
| LC                    | 0.3941 | 0.8194  | 0.2992   | -0.2894 |
| LD                    | 0.4787 | 0.1831  | -0.7756  | 0.3685  |
| SC                    | 0.5023 | -0.2232 | 0.5543   | 0.625   |
| SD                    | 0.6027 | -0.4952 | -0.04156 | -0.6243 |

(b) *P* values of multivariate analysis of variance testing the differences among groups formed by distinct ectomycorrhizal fungi. Data were logarithmically transformed.  $P \leq 0.05$  are shown by bold letters.

| Analysis of Variance |                |    |             |         |              |
|----------------------|----------------|----|-------------|---------|--------------|
| Source               | Sum of Squares | Df | Mean Square | F-Ratio | P-Value      |
| <b>MAIN EFFECTS</b>  |                |    |             |         |              |
| A:Species            | 1204.55        | 9  | 133.84      | 60.57   | <b>0.000</b> |
| B:irradiation        | 0.03           | 1  | 0.03        | 0.01    | 0.909        |
| C:water              | 0.20           | 1  | 0.20        | 0.09    | 0.764        |
| <b>INTERACTIONS</b>  |                |    |             |         |              |
| AB                   | 53.42          | 9  | 5.94        | 2.69    | <b>0.005</b> |
| AC                   | 27.66          | 9  | 3.07        | 1.39    | 0.190        |
| BC                   | 0.09           | 1  | 0.09        | 0.04    | 0.840        |

|                         | <i>Tuber</i> sp 1 | <i>C. geophilum</i> | <i>Tuber</i> sp 2 | <i>T. Punicea</i> | <i>T. badia</i> | <i>Telephoraceae</i> | <i>T. rufum</i> | <i>Sebacinaceae</i> | <i>Cortinarius</i> sp. |
|-------------------------|-------------------|---------------------|-------------------|-------------------|-----------------|----------------------|-----------------|---------------------|------------------------|
| <i>C. geophilum</i>     | 0.903             |                     |                   |                   |                 |                      |                 |                     |                        |
| <i>Tuber</i> sp 2       | 0.180             | 0.205               |                   |                   |                 |                      |                 |                     |                        |
| <i>T. punicea</i>       | 0.979             | 0.920               | 0.315             |                   |                 |                      |                 |                     |                        |
| <i>T. badia</i>         | <b>0.000</b>      | <b>0.000</b>        | <b>0.004</b>      | <b>0.000</b>      |                 |                      |                 |                     |                        |
| <i>Telephoraceae</i>    | <b>0.000</b>      | <b>0.000</b>        | <b>0.002</b>      | <b>0.000</b>      | 0.862           |                      |                 |                     |                        |
| <i>T. rufum</i>         | <b>0.025</b>      | <b>0.013</b>        | 0.187             | <b>0.025</b>      | 0.064           | <b>0.048</b>         |                 |                     |                        |
| <i>Sebacinaceae</i>     | <b>0.000</b>      | <b>0.000</b>        | <b>0.000</b>      | <b>0.000</b>      | 0.084           | 0.294                | <b>0.001</b>    |                     |                        |
| <i>Cortinarius</i> like | <b>0.000</b>      | <b>0.000</b>        | <b>0.000</b>      | <b>0.000</b>      | <b>0.005</b>    | <b>0.024</b>         | <b>0.000</b>    | 0.340               |                        |
| <i>T. viridula</i>      | <b>0.000</b>      | <b>0.000</b>        | <b>0.000</b>      | <b>0.000</b>      | <b>0.053</b>    | 0.193                | <b>0.001</b>    | 0.448               | <b>0.045</b>           |
