# Supplementary material
Source: PubMed Central journal article supplement (PMC3906819)
Supplement: ismej2013158x7.pdf [file ismej2013158x7.pdf]

**Supplementary Table S2. Shannon-Wiener index (H') and Evenness of ectomycorrhizal fungal species associated with the roots of young beech.** LC = full light, well watered; LD = full light, drought; SC = shade, well watered; SD = shade, drought. Values indicate means  $\pm$  SE (n = 10). F and P values are given for the effects of the main variables light (L) and water availability (D).

| Growth regimes | H'              |       | Evenness        |       |
|----------------|-----------------|-------|-----------------|-------|
| LC             | 1.37 $\pm$ 0.08 |       | 0.73 $\pm$ 0.03 |       |
| LD             | 1.29 $\pm$ 0.07 |       | 0.66 $\pm$ 0.04 |       |
| SC             | 1.34 $\pm$ 0.12 |       | 0.71 $\pm$ 0.03 |       |
| SD             | 1.24 $\pm$ 0.12 |       | 0.64 $\pm$ 0.06 |       |
|                | F               | P     | F               | P     |
| L              | 0.00            | 0.968 | 0.34            | 0.564 |
| D              | 0.49            | 0.488 | 2.63            | 0.113 |
