# Supplementary material
Source: PubMed Central journal article supplement (PMC3906819)
Supplement: ismej2013158x8.pdf [file ismej2013158x8.pdf]

**Supplementary Table S3. Number of vital root tips, whole plant  $^{15}\text{N}$  contents and mean N flux through root tips of young beech trees (*Fagus sylvatica*).** RT = root tip, EM = ectomycorrhizal plants, NM = nonmycorrhizal plants, LC = full light, well watered, LD = full light, drought, SC = shade, well watered, SD = shade, drought. Values indicate means  $\pm$  SE (n = 10, except n = 5 for NM plants in LC and LD treatments). F and P values are given for the effects of the main variables mycorrhizal status (EM), light (L) and water availability (D).  $P \leq 0.05$  are shown by bold letters.

| Growth condition | Number of vital root tips (plant <sup>-1</sup> ) |                  | $^{15}\text{N}$ (mg plant <sup>-1</sup> )* |                  | mean N flux ( $^{15}\text{N}$ ng RT <sup>-1</sup> h <sup>-1</sup> ) |                  |
|------------------|--------------------------------------------------|------------------|--------------------------------------------|------------------|---------------------------------------------------------------------|------------------|
| EM-LC            | 4356 $\pm$ 587                                   |                  | 0.74 $\pm$ 0.13                            |                  | 3.04 $\pm$ 0.88                                                     |                  |
| EM-LD            | 5888 $\pm$ 652                                   |                  | 1.49 $\pm$ 0.43                            |                  | 3.07 $\pm$ 0.41                                                     |                  |
| EM-SC            | 3897 $\pm$ 571                                   |                  | 0.38 $\pm$ 0.04                            |                  | 1.21 $\pm$ 0.27                                                     |                  |
| EM-SD            | 4442 $\pm$ 677                                   |                  | 0.57 $\pm$ 0.18                            |                  | 1.53 $\pm$ 0.34                                                     |                  |
| NM-LC            | 2555 $\pm$ 349                                   |                  | 0.72 $\pm$ 0.06                            |                  | 3.69 $\pm$ 0.44                                                     |                  |
| NM-LD            | 3480 $\pm$ 665                                   |                  | 0.65 $\pm$ 0.13                            |                  | 3.56 $\pm$ 0.15                                                     |                  |
| NM-SC            | 2122 $\pm$ 277                                   |                  | 0.27 $\pm$ 0.03                            |                  | 1.46 $\pm$ 0.26                                                     |                  |
| NM-SD            | 2427 $\pm$ 262                                   |                  | 0.45 $\pm$ 0.14                            |                  | 2.33 $\pm$ 0.64                                                     |                  |
|                  | F                                                | P                | F                                          | P                | F                                                                   | P                |
| EM               | 19.4                                             | <b>&lt;0.001</b> | 4.49                                       | <b>0.042</b>     | 1.28                                                                | <b>0.266</b>     |
| L                | 5.53                                             | <b>0.021</b>     | 25.64                                      | <b>&lt;0.001</b> | 16.26                                                               | <b>&lt;0.001</b> |
| D                | 4.00                                             | <b>0.049</b>     | 3.15                                       | 0.086            | 0.38                                                                | 0.541            |

\* data from Pena et al, 2013b
